# Gadd45 $\alpha$ : A Novel Diabetes-Associated Gene Potentially Linking Diabetic Cardiomyopathy and Baroreflex Dysfunction

Ning Wang<sup>1,2</sup><sup>✉</sup>, Chao Yang<sup>1</sup><sup>✉</sup>, Fang Xie<sup>1</sup>, Lihua Sun<sup>1,2</sup>, Xiaolin Su<sup>1</sup>, Ying Wang<sup>1</sup>, Ran Wei<sup>1</sup>, Rong Zhang<sup>1,2</sup>, Xia Li<sup>3</sup>, Baofeng Yang<sup>1,2</sup>, Jing Ai<sup>1,2\*</sup>

**1** Department of Pharmacology, Harbin Medical University (the State-Province Key Laboratory of Biomedicine-Pharmaceutics of China), Harbin, People's Republic of China, **2** Key Laboratory of Cardiovascular Research, Ministry of Education of China, Harbin, People's Republic of China, **3** College of Bioinformatics Science and Technology, Harbin Medical University, Harbin, People's Republic of China

## Abstract

Both diabetic cardiomyopathy (DCM) and baroreflex dysfunction independently contribute to sudden cardiac death (SCD), however the inherent connections between them under diabetic state remains unclear. As microRNAs (miRNAs) have been reported to participate in various physiological and pathological processes, we presume they may also be involved in DCM and DM-induced impairment of baroreflex sensitivity. Two sets of gene expression profiles data from streptozotocin (STZ)-induced diabetic heart and diabetic dorsal root ganglia (DDRG) were retrieved from GEO and ArrayExpress. Co-differentially-expressed genes in diabetic heart and DDRG were identified by *t* test and intersection analysis. Human Protein Reference Database (HPRD) was applied to find direct interacting proteins of Gadd45 $\alpha$ . Differentially-expressed miRNAs in left ventricle from 4-week STZ-induced diabetic rats were screened by miRNA microarray. Expression of miR-499 and its regulating effect on Gadd45 $\alpha$  were then verified by quantitative real-time PCR (qRT-PCR), western blot, computational predication, and dual-luciferase reporter analysis. Four co-differentially-expressed genes in DCM and DDRG were identified. Among these genes, Gadd45 $\alpha$  has 16 direct interacting proteins and 11 of them are documentedly associated with DM. Accompanied with significantly increased miR-499 expression, Gadd45 $\alpha$  expression was increased at mRNA level but decreased at protein level in both diabetic heart and nucleus ambiguus. Furthermore, miR-499 was confirmed negatively regulating Gadd45 $\alpha$  by targeting its 3'UTR. Collectively, reduced Gadd45 $\alpha$  protein expression by forced miR-499 expression indicated it's a diabetes-associated gene which might potentially be involved in both DCM and DM-induced baroreflex dysfunction.

**Citation:** Wang N, Yang C, Xie F, Sun L, Su X, et al. (2012) Gadd45 $\alpha$ : A Novel Diabetes-Associated Gene Potentially Linking Diabetic Cardiomyopathy and Baroreflex Dysfunction. PLoS ONE 7(12): e49077. doi:10.1371/journal.pone.0049077

**Editor:** Rajesh Gopalrao Katare, University of Otago, New Zealand

**Received:** June 20, 2012; **Accepted:** October 4, 2012; **Published:** December 5, 2012

**Copyright:** © 2012 Wang et al. This is an open-access article distributed under the terms of the Creative Commons Attribution License, which permits unrestricted use, distribution, and reproduction in any medium, provided the original author and source are credited.

**Funding:** This study was supported by the Funds for Natural Science Foundation of China (81271207, 81070882), Creative Research Groups of the National Natural Science Foundation of China (81121003), the Outstanding Youth Foundation of Heilongjiang Province (JC200904). The funders had no role in study design, data collection and analysis, decision to publish, or preparation of the manuscript.

**Competing Interests:** The authors have declared that no competing interests exist.

\* E-mail: a.z.hrbmu@gmail.com

✉ These authors contributed equally to this work.

## Introduction

Diabetes mellitus (DM) is an ever-growing problem nowadays, and the number of diabetic adults worldwide is estimated to be 300 million in the year 2025 [1]. Sudden cardiac death (SCD) is the most serious outcome of DM, and clinical data suggested that DM carried a hazard ratio of 3: 23 for SCD [2]. Among the complications of DM, diabetic cardiomyopathy (DCM) and diabetic cardiac autonomic neuropathy (CAN) were reported to be closely associated with SCD in DM [3,4], moreover positive correlation has been established between DCM and diabetic CAN [5,6]. Although substantial efforts have been devoted to revealing the participation of DCM or DM-induced baroreflex dysfunction in SCD, the common inducer contributing to both DCM and impaired baroreflex sensitivity has not been well studied yet. Undoubtedly, investigating the co-differentially-expressed genes in diabetic heart and baroreflex circuitry would be an optimized

approach to find the linker between DCM and diabetic baroreflex dysfunction.

MicroRNAs (miRNAs) are short noncoding RNA molecules playing critical roles in posttranscriptional regulation by inhibiting messenger RNA translation or specially cleaving them [7]. Numerous studies have revealed obvious associations between altered miRNA expression and some diabetic complications [8]. Furthermore, many miRNAs have been reported to play a role in diabetic heart, such as miR-1 [9], miR-133a [10], and miR-320 [11]. Nevertheless, whether miRNAs could regulate the "linker" genes between DCM and DM-induced baroreflex dysfunction and hence contribute to SCD is still undetermined.

The present study suggests that co-differentially-expressed miR-target pair, miR-499::Gadd45 $\alpha$ , might be involved in the tissue-tissue communication between DCM and DM-induced baroreflex dysfunction by an innovative incorporation of bioinformatics, miRNAs microarray analysis and biological experiments, and therefore provides a potential preventive strategy for SCD in DM.

## Methods

### Ethics Statement

The study was performed in strict accordance with the Guide for the *Care and Use of Laboratory Animals of the National Institutes of Health*. The protocol was approved by the committee on the Ethics of Harbin Medical University (No. HMUIRB-2008-06).

### Gene microarray data analysis and hierarchical clustering

In this study, we analyzed two sets of gene expression profiles. One was downloaded from Gene Expression Omnibus (GEO) (<http://www.ncbi.nlm.nih.gov/geo/>) and derived from a study on DCM with 7 samples for control (Ctl) and 7 samples for DCM rat hearts (accession number GSE5606) [12]. The other microarray dataset was downloaded from ArrayExpress database (<http://www.ebi.ac.uk/arrayexpress/>) (accession ID: E-MEXP-515) [13] which detected the gene expression of 17 samples: 3, 3, and 3 samples obtained from the dorsal root ganglia (DRG) of 1, 4, and 8-week streptozotocin (STZ)-induced diabetic rats, and 2, 3, and 3 samples from age-matched Ctl rats. We normalized the microarray data using Arraytools (<http://linus.nci.nih.gov/BRB-ArrayTools.html>). Comparison of gene expression levels between experimental group (1, 4, 8-week DDRG and 16-week DCM; DDRG: diabetic DRG) and the age-matched Ctl group by separate *t* tests. After performing significance analysis of microarray, those showing a significantly different expression ( $P < 0.05$ ) were used for two-dimensional hierarchical clustering using Pearson correlation as similar metrics and complete linkage method for distance determination. Cluster 3.0 and Java TreeView 2.11 (Michael Eisen, <http://rana.lbl.gov/EisenSoftware.htm>) were applied for clustering and visualizing.

### Identification of Gadd45 $\alpha$ direct interacting proteins

The Gadd45 $\alpha$  direct interacting proteins were retrieved from Human Protein Reference Database (HPRD) (<http://hprd.org/>). The graphical output was generated using Cytoscape 2.6.0 (<http://www.cytoscape.org/download.html>).

### Animal and the establishment of STZ-induced diabetic rat model

Twelve male Wistar rats (weight 220–260 g) used in this study were obtained from the Animal Center of the Second Affiliated Hospital of Harbin Medical University (Harbin, Heilongjiang Province, China) and housed at controlled temperature of  $23 \pm 1^\circ\text{C}$  and humidity of  $55 \pm 5\%$ . Animals were maintained on 12-h dark-light artificial cycle (lights on at 07:00 A.M.) with food and water available *ad libitum*. After fasting for 12 h, rats were intraperitoneally (ip) injected with 40 mg/kg of STZ in a 0.1 mol/l citrate buffer solution (pH 4.2) each day for 2 days, or the equal volume of citrate buffer for the rats in control group. Seventy-two hours after the final injection of STZ, the fasting blood glucose (FBG) level was determined from the tail vein of each rat using a Grace glucometer (Grace Medical, Inc., USA). The 6 STZ-induced rats with maintained FBG  $\geq 16.7$  mmol/l were used as established DM models. Four weeks after the induction of DM, all rats were killed for tissue harvesting.

### Quantitative real-time PCR (qRT-PCR)

After successfully construct the diabetic rat model, total RNA samples were isolated with Trizol (Invitrogen, Carlsbad, CA) from neonatal rat cardiac myocytes, left ventricle or nucleus ambiguus (NA) ( $-600$  to  $+600$   $\mu\text{m}$  relative to obex) [14]. Then complementary DNA synthesis was performed using High-Capacity

cDNA reverse transcription kits (Applied biosystems, Cat.# 4375222) according to the manufacturer's instructions with respective primers (rno-miR-499 RT primer: GTCGTATC-CAGTGCCTGTCGTGGAGTCGGCAATTGCACTGGA-TACGACAAACAT; U6 RT primer: CGCTTCAC-GAATTTGCGTGCAT, and Random primer). To quantify the target genes, qRT-PCR was performed with SYBR Green PCR Master Mix Kit (Applied biosystems, Cat.# 4309155) at  $95^\circ\text{C}$  for 10 min and 40 cycles at  $95^\circ\text{C}$  for 15 s,  $60^\circ\text{C}$  for 30 s and  $72^\circ\text{C}$  for 30 s on the 7500 FAST Real-Time PCR System (Applied Biosystems). U6 and  $\beta$ -actin were served as internal controls. The primers used were: Gadd45 $\alpha$  (rat, NM\_024127) sense: 5'-CCATAACTGTTCGGCGTGT-3' and antisense: 5'-CGCAG-GATGTTGATGTCGT-3';  $\beta$ -actin (rat, NM\_031144.3) sense: 5'-ACTATCGGCAATGAGCG-3' and antisense: 5'-GAGC-CAGGGCAGTAATCT-3'; rno-miR-499 sense: 5'-GGGGTTAAGACTTGCAGTG-3' and antisense: 5'-CAGTGCCTGTCGTGGAGT-3'; U6 sense: 5'-GCTTCGGCAGCACATATACTAAAAT-3' and antisense: 5'-CGCTTCACGAATTTGCGTGCAT-3'. The expression levels were compared with the value of Gadd45 $\alpha$  and miR-499 normalized to the amounts of respective endogenous controls ( $\beta$ -actin and U6). The expression levels were indicated with  $2^{-\Delta\Delta\text{Ct}}$ .

### Western Blot analysis

The protein expressions in neonatal rat cardiac myocytes, left ventricle or NA of rats were analyzed by Western blot analysis. The proteins under study were: Gadd45 $\alpha$  (22 kDa) and  $\beta$ -actin (42 kDa). The protein content was determined with Sunrise-basic TECAN (Austria) using bovine serum albumin as the standard. Protein samples were fractionated by SDS-PAGE (10%–20% polyacrylamide gels) and transferred to PVDF membrane (Bio-Rad, Hercules, CA). Samples were incubated with primary antibodies specific for each protein (Santa Cruz, CA, USA) diluted at 1:3000 in PBS buffer for 1 h at room temperature and then incubated with HRP-conjugated secondary antibodies diluted at 1:5000 in the blocking buffer. Western blot bands were quantified using Odyssey v3.0 software (LI-COR Bioscience, Lincoln, NE, USA) by measuring the band intensity (area  $\times$  OD) in each group and normalizing to  $\beta$ -actin and the final results were expressed as relative level by normalizing the data to the control values.

### MiRNA microarray data analysis and target prediction

The miRNA microarray experiment was performed by Kangcheng Bio-tech Inc. (Shanghai, China). Briefly, total RNA was extracted from left ventricle of diabetic and Ctl rats using Trizol reagent with quantity and purity of the RNA by UV absorbance and denaturing agarose gel electrophoresis. The samples (5  $\mu\text{g}$ ) were labeled using the miRCURY<sup>TM</sup> Hy3<sup>TM</sup> Array labeling kit (Exiqon, Cat# 208032), and hybridized in Hybridization Chamber II (Corning, Ambion, TX, USA, Cat# 40080) using miRCURY<sup>TM</sup> Array microarray kit (Exiqon, Cat# 209002V8.1). After hybridization, the scanning was processed by a Genepix 4000B scanner (Molecular Devices, Downingtown, PA, USA). Data was analyzed by Genepix Pro 6.0 (Molecular Devices). To evaluate the significance of microarray results, random distribution was performed in MATLAB (R2008a) ([http://download.cnet.com/Matlab/3000-2053\\_4-534283.html](http://download.cnet.com/Matlab/3000-2053_4-534283.html)). After 100,000 times random sampling,  $P < 0.05$  was considered as significant difference to determine the differentially-expressed miRNAs. The miRNA expression levels from diabetic rats were compared with normal rats and the relative fold changes were

calculated to present the up- or down-regulation of miRNAs. The miR-target pairs were predicted by MicroCosm Targets (Version 5, <http://www.ebi.ac.uk/enright-srv/microcosm/htdocs/targets/v5/>), Targetscan (Release 6.0, <http://www.targetscan.org/>), and PicTar (<http://pictar.mdc-berlin.de/>).

### Synthesis of various oligonucleotides

Rat miR-499 (GenBank acc. NR\_032141) mimics (sense: 5'-UUAAGACUUGCAGUGAUGUUUGU-3', antisense: 5'-AAACAUCACUGCAAGUCUAAA-3'), and rat miR-499 inhibitors (antisense oligonucleotides of mature miR-499, AMO-499: 5'-+A+C+A+A+ACATCACTGCAAGT+C+T+T+A+A-3') were synthesized by Integrated DNA Technologies, Inc. (IDT, Coralville, IA, USA). The 5 deoxynucleotides at both ends of AMO-499 were locked (2'-O-methyl modifications at every base and a 4'-C-containing amino linker). In addition, a scrambled RNA was used as negative control (NC, sense: 5'-UUCUCCGAACGUGUCACGUTT-3' and antisense: 5'-ACGUGACACGUUCGGAAATT-3').

### Cell culture and transfection

Neonatal rat cardiac myocytes were washed with serum-free medium and incubated in 6-well plates with 2 ml fresh fetal bovine serum (FBS). And then, cells ( $2 \times 10^5$ /well) were transfected with 50 nM miR-499, AMO-499 or negative control (NC) with X-treme GENE siRNA transfection reagent (Roche, Cat.# 04476093001) according to the manufacturer's instructions. Following transfection (48 h), cells were used for RNA or protein assay.

### Dual-luciferase Reporter Assay

Human embryonic kidney (HEK293) cells were cultured in DMEM supplemented with 10% FBS at 37°C with 5% CO<sub>2</sub>. The 3'UTR of Gadd45 $\alpha$  holding miR-499 binding sites were cloned downstream of the luciferase reporter in pMIR-REPORT<sup>TM</sup> luciferase miRNA expression reporter vector (Ambion, Inc.). For luciferase assay, HEK293 cells were first starved in serum-free medium for 12 h, then transfected with 100 ng the chimeric plasmid (firefly luciferase vector), 20 ng PRL-TK (TK-driven Renilla luciferase expression vector) and 50 nM miR-499, AMO-499 or NC using X-treme GENE siRNA transfection reagent. Forty-eight hours after transfection, luciferase activities were measured with a Dual Luciferase Reporter Assay System (Promega, Cat.# E1960) on a luminometer (GloMax<sup>TM</sup> 20/20, Promega, USA).

### Statistical analysis

In biological experiments, data between two groups were expressed as mean  $\pm$  SEM and compared using Student's *t*-test.  $P < 0.05$  was considered statistically significant.

## Results

### Co-differentially-expressed genes in DCM and DDRG

By significance analysis of microarray, co-differentially-expressed genes of 1, 4 and 8-week DDRG as well as 16-week DCM were identified. As shown in Table 1, based on effective detected probes, the number of up- and down-regulated genes differed among these groups, which suggested the disparity of gene expression pattern in various tissues and time courses of DM. The heat maps after clustering algorithms for each pair of comparison were presented in Fig. 1, which well distinguished differentially-expressed genes in diabetic samples from relative controls. To further investigate the associations between differentially-expressed

genes in DDRG and DCM, intersection analysis was carried out. As displayed in Fig. 2, we found 106 co-differentially-expressed genes in DCM and 1-week DDRG, 97 in DCM and 4-week DDRG, and 131 in DCM and 8-week DDRG. Notably, only the following 4 genes were identified in all the three previous intersection analysis: Gadd45 $\alpha$  (growth arrest and DNA-damage-inducible, alpha), Ada (adenosine deaminase), Txnip (thioredoxin interacting protein), and Scn7a (sodium channel, voltage-gated, type VII, alpha). Considering the established effects of both Ada [15,16] and Txnip [17] in DM and the largely undetermined biological function of Scn7a, we decided to focus on the role of Gadd45 $\alpha$  in the crosstalk between DCM and diabetic baroreflex dysfunction.

### The direct interacting proteins of Gadd45 $\alpha$ involved in DM

Although Gadd45 $\alpha$  has been reported to participate in various physiological and pathological process [18], its role in DM has been seldom studied. In consideration with the complexity of DM, we herein presume that Gadd45 $\alpha$  might be involved in a gene-interacting network and function with other DM-associated gene. As illustrated in Fig. 3, 16 direct interacting proteins of Gadd45 $\alpha$  were identified by HPRD, and 11 of these direct interacting proteins have documented roles in DM (Table 2).

### Altered Gadd45 $\alpha$ expression in heart and NA from 4-week STZ-induced diabetic rats

As NA is the exactly predominant component of baroreflex circuitry, we then validated the above bioinformatics results by analyzing Gadd45 $\alpha$  expressions in heart and NA from 4-week STZ-induced diabetic rats. As shown in Fig. 4A, compared with Ctl samples, the mRNA expressions of Gadd45 $\alpha$  were increased by  $2.33 \pm 0.67$  folds ( $P < 0.05$ ) and  $2.26 \pm 0.60$  folds ( $P < 0.05$ ) in diabetic heart and NA, respectively. However, the protein levels of Gadd45 $\alpha$  were  $0.57 \pm 0.16$  fold ( $P < 0.05$ ) and  $0.46 \pm 0.14$  fold ( $P < 0.05$ ) in diabetic heart and NA compared with Ctl samples (Fig. 4B), which indicated the potential post-transcriptional mechanism might underlie the converse alternations in mRNA and protein levels.

### MiR-499 and Gadd45 $\alpha$ , a co-differentially-expressed miR-target pair in heart and NA

As miRNAs are well-known post-transcriptional factors, we speculated whether certain DM-induced differentially-expressed miRNAs underlie the altered Gadd45 $\alpha$  expression in diabetic heart and NA. Left ventricles from diabetic and control rats were collected for miRNAs microarray analysis. Compared with Ctl samples, 7 up-regulated and 7 down-regulated miRNAs with significant changes ( $P < 0.05$ ) were presented in Fig. 5A. To identify the miRNAs with regulating effect on Gadd45 $\alpha$  from these differentially-expressed miRNAs, 20 miRNAs being predicted to regulate Gadd45 $\alpha$  by MicroCosm Targets, Targetscan, and PicTar were presented in Table 3. Furthermore, miRNAs microarray results indicated miR-499 was the single differentially-expressed miRNA among these regulating miRNAs of Gadd45 $\alpha$  (Fig. 5A). Consistent with miRNAs microarray results, the subsequent qRT-PCR detection showed that DM led to miR-499 expression increased by  $1.61 \pm 0.12$  folds ( $P < 0.05$ ) and  $1.83 \pm 0.18$  folds ( $P < 0.05$ ) in diabetic heart and NA, respectively (Fig. 5B).

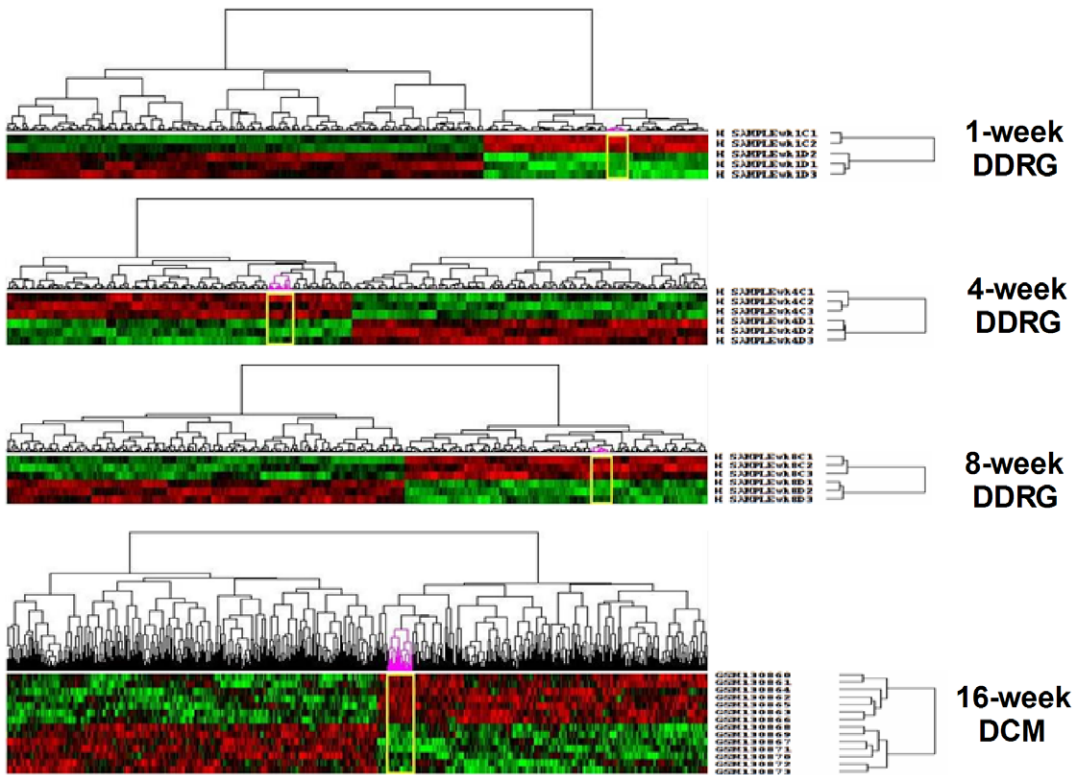

**Figure 1. Co-differentially-expressed genes in 1, 4, and 8-week diabetic dorsal root ganglia (DDR) and 16-week diabetic cardiomyopathy (DCM).** Heat map represents data from the datasets of DDRG and DCM. Genes were identified by performing *t* tests on the large original dataset and comparing each diabetic group with the relative control group. Features with significantly different expression ( $P < 0.05$ ) were included. Heat map is organized with individual samples arranged along the Y-axis, and the relative ratios of expression were indicated by color. Color intensity is scaled as highest expression corresponding to bright red and the lowest expression corresponding to bright green. Heat map indicated that these genes were able to accurately classify different diabetic samples and relative controls, suggesting the representative roles of these genes in diabetes.

doi:10.1371/journal.pone.0049077.g001

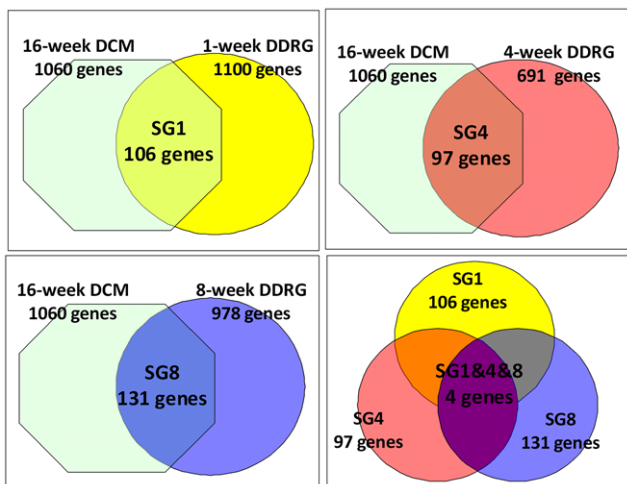

**Figure 2. Identification of co-differentially-expressed genes between diabetic dorsal root ganglia (DDR) and diabetic cardiomyopathy (DCM).** Intersection analysis of differentially-expressed genes was performed to get shared genes 1 (SG1) between 16-week DCM and 1-week DDRG (A); shared genes 4 (SG4) between 16-week DCM and 4-week DDRG (B); shared genes 8 (SG8) between 16-week DCM and 8-week DDRG (C); and shared genes 1, 4 and 8 (SG1&4&8) among SG1, SG4 and SG8 (D).

doi:10.1371/journal.pone.0049077.g002

**MiR-499 negatively regulating Gadd45 $\alpha$**

As miR-499 and Gadd45 $\alpha$  displayed complementarity (Fig. 5C), luciferase analysis was performed to directly verify the regulating effect of miR-499 on Gadd45 $\alpha$ . As shown in Fig. 5D, miR-499 transfection resulted in a notable decrease in luciferase activity of the chimeric luciferase vectors of Gadd45 $\alpha$  ( $P < 0.05$ , vs NC), which was significantly alleviated by co-transfected with AMO-499 ( $P < 0.05$ , vs miR-499). To further investigate the biological effect of miR-499 on the Gadd45 $\alpha$  expression, neonatal rat cardiac myocytes were used and transfected with miR-499, AMO-499 or NC. As demonstrated in Fig. 5E, transfection of miR-499

**Table 1.** Differentially-expressed genes in 1, 4, and 8-week diabetic dorsal root ganglia (DDR), and 16-week diabetic cardiomyopathy (DCM).

| Group       | Probes | Genes        |                |       |
|-------------|--------|--------------|----------------|-------|
|             |        | Up-regulated | Down-regulated | Total |
| 1-week DDRG | 1750   | 748          | 352            | 1100  |
| 4-week DDRG | 2765   | 350          | 341            | 691   |
| 8-week DDRG | 2800   | 555          | 423            | 978   |
| 16-week DCM | 1423   | 561          | 499            | 1060  |

doi:10.1371/journal.pone.0049077.t001

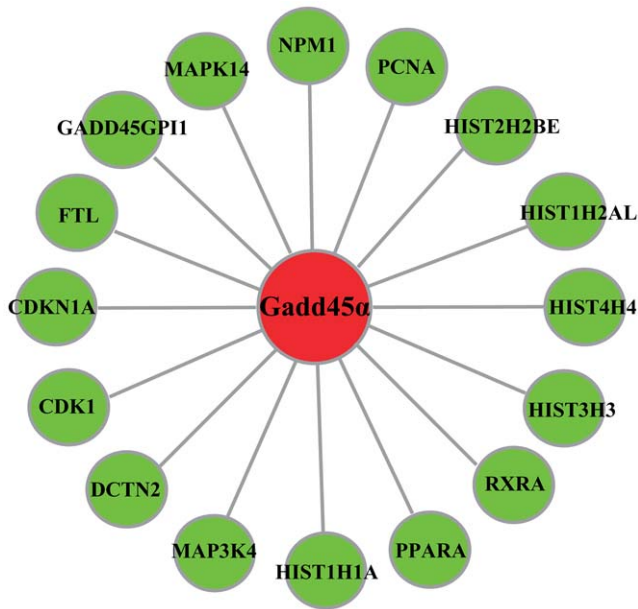

**Figure 3. The direct interacting proteins of Gadd45 $\alpha$ .**  
doi:10.1371/journal.pone.0049077.g003

or AMO-499 showed no significant effect on the Gadd45 $\alpha$  expression at mRNA level ( $P > 0.05$  vs NC). However, miR-499 significantly suppressed the protein expression of Gadd45 $\alpha$  by 56% ( $P < 0.05$ , vs NC), which could be partially reversed by co-transfection of AMO-499 ( $P < 0.05$ , vs miR-499) (Fig. 5F). These results implied that miR-499 might repress Gadd45 $\alpha$  expression by inhibiting transcription.

## Discussion

In the present study, by the combination of bioinformatics and biological experiments, we found that 11 proteins among 16 direct interacting proteins of Gadd45 $\alpha$  are highly associated with DM. In addition, Gadd45 $\alpha$  and miR-499 were co-differentially expressed

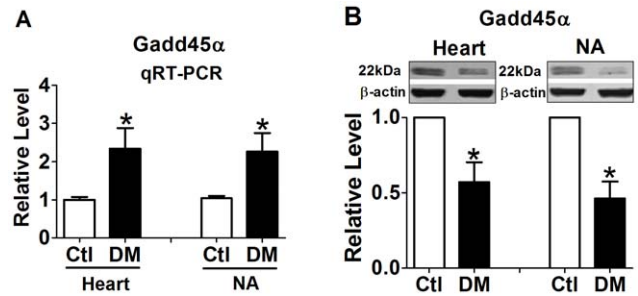

**Figure 4. The Gadd45 $\alpha$  mRNA (A) and protein expression (B) in diabetic heart and nucleus ambiguus (NA).** \* $P < 0.05$  vs Ctl. Values are means of 6 independent experiments, with standard errors represented by vertical bars.  
doi:10.1371/journal.pone.0049077.g004

in diabetic heart and NA, and Gadd45 $\alpha$  is negatively regulated by miR-499. These findings suggest that the decreased Gadd45 $\alpha$  protein level result from elevated miR-499 expression might potentially contribute to SCD in DM by their congenous effects on diabetic heart and baroreceptor reflex.

DCM and baroreflex dysfunction were reported to be closely associated with SCD in DM [3,4], and NA is an established predominant component of autonomic nervous system playing a vital role in heart rate control [19]. Therefore, NA and left ventricle of STZ-induced diabetic rats were studied for biological experiments to investigate tissue-tissue communication between DCM and diabetic baroreflex dysfunction in the present study. Although expression data of diabetic heart was acquired from GEO, we failed to get any expression data based on diabetic NA. Considering the similarity in organ development, a data profile deriving from STZ-induced diabetic neural system - DDRG was used to screen differentially-expressed genes. Co-differentially-expressed genes between DDRG and DCM were initially identified, and the hierarchical clustering of significantly differentially-expressed genes indicated an excellent distinction between disease and control groups (Fig. 1), which suggested the reliability of the criteria for our initial screening. Although there are hundreds of differentially-expressed genes in diabetic heart and

**Table 2. The involvement of Gadd45 $\alpha$  direct interacting proteins in diabetes mellitus.**

| Gene Name                                                          | Annotation                                                                                              | Reference |
|--------------------------------------------------------------------|---------------------------------------------------------------------------------------------------------|-----------|
| PPARA                                                              | peroxisome proliferator-activated receptor alpha                                                        | [28,29]   |
| PCNA                                                               | proliferating cell nuclear antigen                                                                      | [44]      |
| MAPK14                                                             | MAPK14                                                                                                  | [45]      |
| CDKN1A                                                             | Cyclin-dependent kinase inhibitor 1A                                                                    | [31–34]   |
| RXRA                                                               | Retinoid X receptor, alpha                                                                              | [46]      |
| CDK1                                                               | CDC2                                                                                                    | [47]      |
| Histone gene family (HIST1H1A/HIST1H2AL/HIST2H2BE/HIST3H3/HIST4H4) | Histone family (Histone 1, H1a/H2A histone family member 1/Histone 2, H2BE/Histone 3, H3/Histone 4, H4) | [25,26]   |
| MAP3K4                                                             | MAP3K4                                                                                                  | Negative  |
| NPM1                                                               | Nucleophosmin 1                                                                                         | Negative  |
| DCTN2                                                              | Dynamitin                                                                                               | Negative  |
| FTL                                                                | Ferritin light chain                                                                                    | Negative  |
| GADD45GPI1                                                         | PRG6                                                                                                    | Negative  |

doi:10.1371/journal.pone.0049077.t002

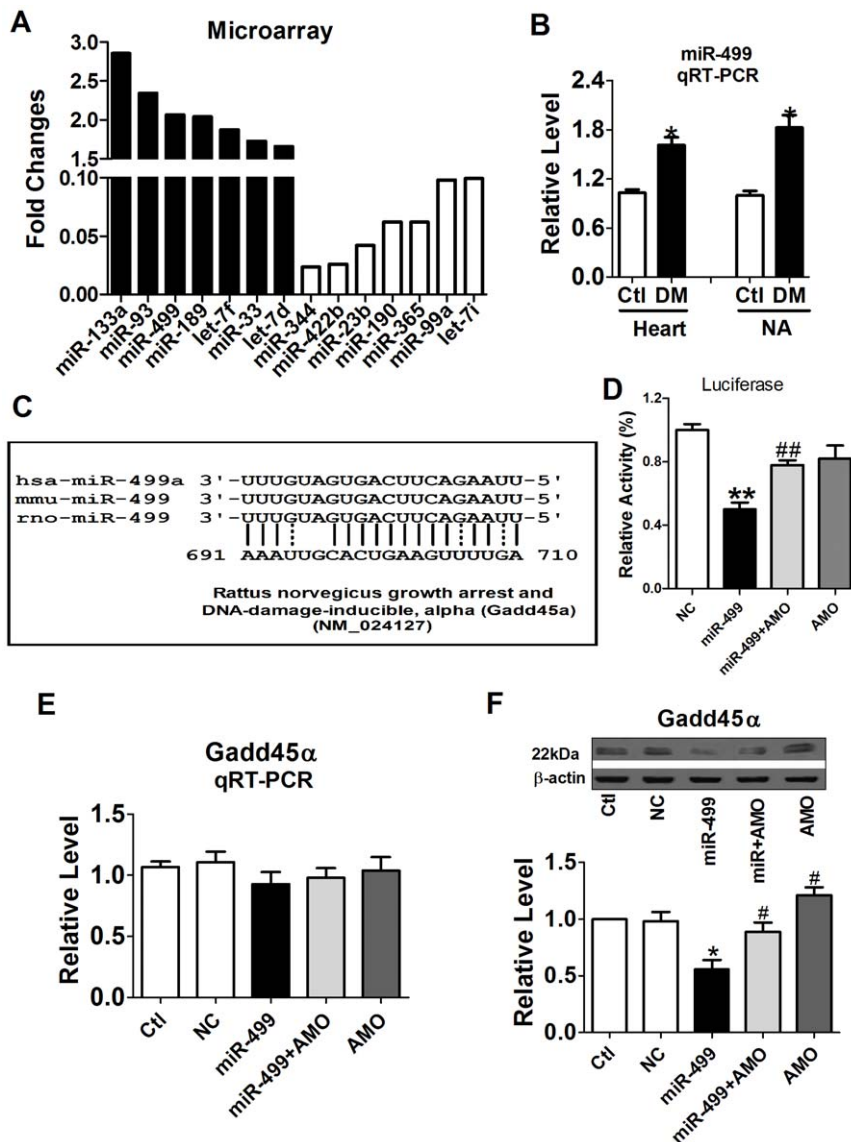

**Figure 5. Increased expression of miR-499 in diabetic cardiomyopathy (DCM) and the effect of miR-499 on the expression of Gadd45 $\alpha$ .** (A) MiRNAs with significantly different expression ( $P < 0.05$ ) in DCM detecting by miR microarray ( $n = 3$ ). (B) The expression of miR-499 was increased in diabetic heart and nucleus ambiguus (NA).  $*P < 0.05$  vs Ctl. (C) Complementarity between miR-499 and Gadd45 $\alpha$ . (D) Suppression of miR-499 on the translation of Gadd45 $\alpha$  by luciferase assay. The mRNA (E) and protein (F) expression of Gadd45 $\alpha$  in miR-499 treated neonatal cardiac myocytes.  $*P < 0.05$  vs Negative control (NC).  $**P < 0.01$  vs NC; #  $P < 0.05$  vs miR-499; ##  $P < 0.01$  vs miR-499. Values are means of 6 independent experiments, with standard errors represented by vertical bars. doi:10.1371/journal.pone.0049077.g005

DDRG at different time points in the course of the disease, four co-differentially-expressed genes (Gadd45 $\alpha$ , Ada, Scn7a, and Txnip) were ultimately identified by intersection analysis between DDRG and DCM in all marked time points.

Consistent with our results, lines of reports have revealed the involvement of Txnip [17] and Ada [15,16] in DM. Furthermore, Ada has been proposed as a potential biomarker of type 2 DM and diabetic nephropathy [20]. These studies provide sound evidence for the reliability of the co-differentially-expressed genes found in the present study. Although the biological function of Scn7a that encodes Na $\chi$  (a sodium channel of voltage-gated sodium channel family) [21] remains fragmental, our results prompt the potential role of Scn7a in DM-induced cardiovascular disease. Since studies on Txnip or Ada in DM are commonplace and no direct interacting proteins of Scn7a documented in HRPD led to

difficulties in revealing its role in pathologies, we have not further investigated these genes.

Compared with the 3 genes discussed above, Gadd45 $\alpha$  has been widely studied as a common expressed protein involved in cell growth, DNA repair and apoptosis [18]. The growth arrest- and DNA damage-induced (GADD) 45 protein family, comprising GADD34, GADD45 $\alpha$ , GADD45 $\beta$ , GADD45 $\gamma$ , and GADD153, are widely expressed in mammalian cells and regulate coordinately. Amongst this family, GADD45 $\alpha$  is predominantly nuclear localized, and responses to various cellular stresses and stimuli, including DNA damage, cellular senescence, apoptosis, oxidants, ionizing radiation, hypoxia, growth-factor deficiency, and ultraviolet light [22]. In addition, GADD45 $\alpha$  is regulated by multiple transcriptional and post-transcriptional factors [22] and associated

**Table 3.** Computationally predicted miRNAs targeting Gadd45 $\alpha$ .

| Predicted miRNA | MicroCosm Targets | TargetScan | PicTar |
|-----------------|-------------------|------------|--------|
| miR-101a*       | Yes               |            |        |
| miR-130a        | Yes               |            | Yes    |
| miR-130b        | Yes               |            | Yes    |
| miR-134         | Yes               |            |        |
| miR-148a        |                   |            | Yes    |
| miR-148b-3p     | Yes               | Yes        | Yes    |
| miR-152         | Yes               | Yes        | Yes    |
| miR-219-2-3p    | Yes               |            |        |
| miR-223         | Yes               |            |        |
| miR-29b-1*      | Yes               |            |        |
| miR-301a        | Yes               |            | Yes    |
| miR-301b        | Yes               |            | Yes    |
| miR-327         | Yes               |            |        |
| miR-374         | Yes               |            | Yes    |
| miR-376b-3p     | Yes               |            |        |
| miR-499         | Yes               |            |        |
| miR-7a*         | Yes               |            |        |
| miR-871         | Yes               |            |        |
| miR-881         | Yes               |            |        |
| miR-883         | Yes               |            |        |

doi:10.1371/journal.pone.0049077.t003

with lines of pathologies [23]. Nevertheless, little work has been done to demonstrate the role of Gadd45 $\alpha$  in DM.

To further investigate the potential role of GADD45 $\alpha$  in DCM and diabetic baroreflex dysfunction, we resorted to HPRD and identified its first-order interacting proteins in the present study (Fig. 3). As indicated in Table 2, histone-related and another 6 direct interacting proteins of GADD45 $\alpha$  have been documented to be involved in DM, with examples as following: 5 members of histone gene family (Histone 1, H1a/H2A histone family member 1/Histone 2, H2BE/Histone 3, H3/Histone 4, H4) with potential participation in “histone code” hypothesis are pointed out to be associated with DM [24,25,26]; peroxisome proliferator-activated receptor alpha (PPARA) is dominantly located in the liver, kidney, and heart, and positively regulates the expression of genes implicated in fatty acid metabolism [27], the genetic variation at its locus is crucial to the incidence of diabetic cardiovascular complications [28], and its promoter variant was reported to decrease mortality after acute coronary ischemia in diabetic patients [29]; CDKN1A (cyclin-dependent kinase inhibitor 1A, p21, Cip1) encoding a protein widely binding to and repressing cyclin-cyclin-dependent kinase complexes is involved in carcinogenesis, senescence, and age-related diseases [30], and its demethylation induced by oxidative damage could function in the P53-dependent activation of cardiac cell death therefore contributes to the development of DCM [31], meanwhile it is also involved in diabetic nephropathy [32],  $\beta$ -cell glucose toxicity [33], and DM-associated vascular diseases [34].

These associations between the direct interacting proteins of GADD45 $\alpha$  and DM established a regulating network of

GADD45 $\alpha$ , and provided circumstantial evidence that GADD45 $\alpha$  might exert important functions by affecting its multiple direct interacting proteins in DCM and diabetic baroreflex dysfunction. Consequently, we further investigated the underlying mechanism of altered GADD45 $\alpha$  expression under diabetic state. According to biological experimental results, we found the expression of Gadd45 $\alpha$  was increased at mRNA level and decreased at protein level in both diabetic heart and NA. As miRNAs are short noncoding RNA molecules functioning by inhibiting translation or promoting mRNA degradation [7], we speculated the disparate mRNA and protein expressions of Gadd45 $\alpha$  might be resulted from certain altered microRNAs expression. We then performed microRNAs microarray and found 14 differentially-expressed microRNAs in diabetic heart. Among these microRNAs only miR-499 is computationally predicted to target Gadd45 $\alpha$ .

MiR-499 has been established to reflect myocardial damage [35,36], blunt the cardiac stress response [37], facilitate ventricular specification of human embryonic stem cells (hESCs) [38], be associated with cardiac differentiation [39], and regulate differentiation and proliferation in human-derived cardiomyocyte progenitor cells [40]. In addition, the expression of miR-499 was increased at circulating level after acute myocardial infarction [41,42]. In the present study, increased miR-499 expression was verified by both miRNAs microarray analysis and qRT-PCR in diabetic samples. Interestingly, inconsistent with our observation of increased miR-499 in left ventricle and NA from 4-week STZ-induced diabetic rats, it is reported miR-499 expression was repressed in the retinas of 3-month STZ-induced diabetic rats [43]. The reversed alternations in miR-499 expression might be largely attributing to the different time courses (4 weeks *vs* 3 months) of DM.

In conclusion, increased miR-499 level accompanied with reduced Gadd45 $\alpha$  protein expression was observed in the present study, which suggests that miR-499 :: Gadd45 $\alpha$  might participate in the process of diabetic heart disease in STZ-induced diabetic rats. However, either miR-499 :: Gadd45 $\alpha$  plays a key role or just acts as a cofactor without any critical influence in DCM and DM-induced baroreflex dysfunction needs to be further investigated separately in the future. Nonetheless, the differentially-expressed miR-target pair, miR-499 :: Gadd45 $\alpha$ , was identified in DCM and DM-induced baroreflex dysfunction by the combination of bioinformatics and biological experiments. Furthermore, the numerous diabetes-associated direct interacting proteins of GADD45 $\alpha$  indicated the importance of GADD45 $\alpha$  in DM, and provide circumstantial evidence that GADD45 $\alpha$  potentially acts as a linker between DCM and baroreflex dysfunction. Therefore, these findings establish a molecular foundation for further study on SCD in DM, and provide a new light on the predictive strategies for SCD in DM.

## Acknowledgments

We thank Dr. Zixi Cheng for continued support, advice and reading of the manuscript.

## Author Contributions

Conceived and designed the experiments: JA NW CY BY. Performed the experiments: LS XS YW RW RZ CY. Analyzed the data: JA NW CY FX LS. Contributed reagents/materials/analysis tools: XL. Wrote the paper: JA FX.

## References

- King H, Aubert RE, Herman WH (1998) Global burden of diabetes, 1995–2025: prevalence, numerical estimates, and projections. *Diabetes Care* 21: 1414–1431.
- Balkau B, Jouven X, Ducimetiere P, Eschwege E (1999) Diabetes as a risk factor for sudden death. *Lancet* 354: 1968–1969.
- Francis GS (2001) Diabetic cardiomyopathy: fact or fiction? *Heart* 85: 247–248.
- Lawrence IG, Weston PJ, Bennett MA, McNally PG, Burden AC, et al. (1997) Is impaired baroreflex sensitivity a predictor or cause of sudden death in insulin-dependent diabetes mellitus? *Diabet Med* 14: 82–85.
- Poirier P, Bogaty P, Philippon F, Garneau C, Fortin C, et al. (2003) Preclinical diabetic cardiomyopathy: relation of left ventricular diastolic dysfunction to cardiac autonomic neuropathy in men with uncomplicated well-controlled type 2 diabetes. *Metabolism* 52: 1056–1061.
- Fang ZY, Prins JB, Marwick TH (2004) Diabetic cardiomyopathy: evidence, mechanisms, and therapeutic implications. *Endocr Rev* 25: 543–567.
- Bartel DP (2004) MicroRNAs: genomics, biogenesis, mechanism, and function. *Cell* 116: 281–297.
- Kantharidis P, Wang B, Carew RM, Lan HY (2011) Diabetes complications: the microRNA perspective. *Diabetes* 60: 1832–1837.
- Katare R, Caporali A, Zenfilin L, Avolio E, Sala-Newby G, et al. (2011) Intravenous gene therapy with PIM-1 via a cardiotropic viral vector halts the progression of diabetic cardiomyopathy through promotion of prosurvival signaling. *Circ Res* 108: 1238–1251.
- Feng B, Chen S, George B, Feng Q, Chakrabarti S (2010) miR133a regulates cardiomyocyte hypertrophy in diabetes. *Diabetes Metab Res Rev* 26: 40–49.
- Wang XH, Qian RZ, Zhang W, Chen SF, Jin HM, et al. (2009) MicroRNA-320 expression in myocardial microvascular endothelial cells and its relationship with insulin-like growth factor-1 in type 2 diabetic rats. *Clin Exp Pharmacol Physiol* 36: 181–188.
- Glyn-Jones S, Song S, Black MA, Phillips AR, Choong SY, et al. (2007) Transcriptomic analysis of the cardiac left ventricle in a rodent model of diabetic cardiomyopathy: molecular snapshot of a severe myocardial disease. *Physiol Genomics* 28: 284–293.
- Price SA, Zeef LA, Wardleworth L, Hayes A, Tomlinson DR (2006) Identification of changes in gene expression in dorsal root ganglia in diabetic neuropathy: correlation with functional deficits. *J Neuropathol Exp Neurol* 65: 722–732.
- Yan B, Li L, Harden SW, Gozal D, Lin Y, et al. (2009) Chronic intermittent hypoxia impairs heart rate responses to AMPA and NMDA and induces loss of glutamate receptor neurons in nucleus ambiguus of F344 rats. *Am J Physiol Regul Integr Comp Physiol* 296: R299–308.
- Lee JG, Kang DG, Yu JR, Kim Y, Kim J, et al. (2011) Changes in Adenosine Deaminase Activity in Patients with Type 2 Diabetes Mellitus and Effect of DPP-4 Inhibitor Treatment on ADA Activity. *Diabetes Metab J* 35: 149–158.
- Ghaemi Oskouie F, Shamel A, Yang A, Desrosiers MD, Mucsi AD, et al. (2011) High levels of adenosine deaminase on dendritic cells promote autoreactive T cell activation and diabetes in nonobese diabetic mice. *J Immunol* 186: 6798–6806.
- Hamada Y, Fukagawa M (2007) A possible role of thioredoxin interacting protein in the pathogenesis of streptozotocin-induced diabetic nephropathy. *Kobe J Med Sci* 53: 53–61.
- Rosemary Siafakas A, Richardson DR (2009) Growth arrest and DNA damage-45 alpha (GADD45alpha). *Int J Biochem Cell Biol* 41: 986–989.
- Yan B, Li L, Harden SW, Epstein PN, Wurster RD, et al. (2009) Diabetes induces neural degeneration in nucleus ambiguus (NA) and attenuates heart rate control in OVE26 mice. *Exp Neurol* 220: 34–43.
- Guttula SV, Rao AA, Sridhar GR, Chakravarthy MS, Nageshwararo K, et al. (2010) Cluster analysis and phylogenetic relationship in biomarker identification of type 2 diabetes and nephropathy. *Int J Diabetes Dev Ctries* 30: 52–56.
- Garcia-Villegas R, Lopez-Alvarez LE, Arni S, Rosenbaum T, Morales MA (2009) Identification and functional characterization of the promoter of the mouse sodium-activated sodium channel Na(x) gene (Scn7a). *J Neurosci Res* 87: 2509–2519.
- Lal A, Gorospe M (2006) Egad, more forms of gene regulation: the gadd45a story. *Cell Cycle* 5: 1422–1425.
- Moskalev AA, Smit-McBride Z, Shaposhnikov MV, Plyusnina EN, Zhavoronkov A, et al. (2011) Gadd45 proteins: Relevance to aging, longevity and age-related pathologies. *Ageing Res Rev* 11: 51–66.
- Jenuwein T, Allis CID (2001) Translating the histone code. *Science* 293: 1074–1080.
- Gray SG, De Meyts P (2005) Role of histone and transcription factor acetylation in diabetes pathogenesis. *Diabetes Metab Res Rev* 21: 416–433.
- Christensen DP, Dahllof M, Lundh M, Rasmussen DN, Nielsen MD, et al. (2011) Histone deacetylase (HDAC) inhibition as a novel treatment for diabetes mellitus. *Mol Med* 17: 378–390.
- Lefebvre P, Chinetti G, Fruchart JC, Staels B (2006) Sorting out the roles of PPAR alpha in energy metabolism and vascular homeostasis. *J Clin Invest* 116: 571–580.
- Doney AS, Fischer B, Lee SP, Morris AD, Leese G, et al. (2005) Association of common variation in the PPARA gene with incident myocardial infarction in individuals with type 2 diabetes: a Go-DARTS study. *Nucl Recept* 3: 4.
- Cresci S, Huss JM, Beitelshes AL, Jones PG, Minton MR, et al. (2010) A PPARalpha promoter variant impairs ERR-dependent transactivation and decreases mortality after acute coronary ischemia in patients with diabetes. *PLoS One* 5: e12584.
- Chang BD, Watanabe K, Broude EV, Fang J, Poole JC, et al. (2000) Effects of p21Waf1/Cip1/Sd1 on cellular gene expression: implications for carcinogenesis, senescence, and age-related diseases. *Proc Natl Acad Sci U S A* 97: 4291–4296.
- Monkemann H, De Vriese AS, Blom HJ, Kluijtmans LA, Heil SG, et al. (2002) Early molecular events in the development of the diabetic cardiomyopathy. *Amino Acids* 23: 331–336.
- Al-Douhaji M, Brugarolas J, Brown PA, Stehman-Breen CO, Alpers CE, et al. (1999) The cyclin kinase inhibitor p21WAF1/CIP1 is required for glomerular hypertrophy in experimental diabetic nephropathy. *Kidney Int* 56: 1691–1699.
- Kaneto H, Kajimoto Y, Fujitani Y, Matsuoka T, Sakamoto K, et al. (1999) Oxidative stress induces p21 expression in pancreatic islet cells: possible implication in beta-cell dysfunction. *Diabetologia* 42: 1093–1097.
- Brizzi MF, Dentelli P, Pavan M, Rosso A, Gambino R, et al. (2002) Diabetic LDL inhibits cell-cycle progression via STAT5B and p21(waf). *J Clin Invest* 109: 111–119.
- Corsten MF, Dennert R, Jochems S, Kuznetsova T, Devaux Y, et al. (2010) Circulating MicroRNA-208b and MicroRNA-499 reflect myocardial damage in cardiovascular disease. *Circ Cardiovasc Genet* 3: 499–506.
- Adachi T, Nakanishi M, Otsuka Y, Nishimura K, Hirokawa G, et al. (2010) Plasma microRNA 499 as a biomarker of acute myocardial infarction. *Clin Chem* 56: 1183–1185.
- Shieh JT, Huang Y, Gilmore J, Srivastava D (2011) Elevated miR-499 levels blunt the cardiac stress response. *PLoS One* 6: e19481.
- Fu JD, Rushing SN, Lieu DK, Chan CW, Kong CW, et al. (2011) Distinct Roles of MicroRNA-1 and -499 in Ventricular Specification and Functional Maturation of Human Embryonic Stem Cell-Derived Cardiomyocytes. *PLoS One* 6: e27417.
- Wilson KD, Hu S, Venkatasubrahmanyam S, Fu JD, Sun N, et al. (2010) Dynamic microRNA expression programs during cardiac differentiation of human embryonic stem cells: role for miR-499. *Circ Cardiovasc Genet* 3: 426–435.
- Shuijter JP, van Mil A, van Vliet P, Metz CH, Liu J, et al. (2010) MicroRNA-1 and -499 regulate differentiation and proliferation in human-derived cardiomyocyte progenitor cells. *Arterioscler Thromb Vasc Biol* 30: 859–868.
- Fichtlscherer S, Zeiher AM, Dimmeler S (2011) Circulating microRNAs: biomarkers or mediators of cardiovascular diseases? *Arterioscler Thromb Vasc Biol* 31: 2383–2390.
- Dimmeler S, Zeiher AM (2010) Circulating microRNAs: novel biomarkers for cardiovascular diseases? *Eur Heart J* 31: 2705–2707.
- Kovacs B, Lumayag S, Cowan C, Xu S (2011) MicroRNAs in early diabetic retinopathy in streptozotocin-induced diabetic rats. *Invest Ophthalmol Vis Sci* 52: 4402–4409.
- Salama M, Tsuji M, Tamura M, Kagawa S (1998) Impact of aging and diabetes mellitus on the expression of the proliferating cell nuclear antigen in rat testicular tissue. *Arch Androl* 40: 95–107.
- Dhar MS, Yuan JS, Elliott SB, Sommardahl C (2006) A type IV P-type ATPase affects insulin-mediated glucose uptake in adipose tissue and skeletal muscle in mice. *J Nutr Biochem* 17: 811–820.
- Shi H, Lu Y, Du J, Du W, Ye X, et al. (2012) Application of Back Propagation Artificial Neural Network on Genetic Variants in Adiponectin ADIPOQ, Peroxisome Proliferator-Activated Receptor-gamma, and Retinoid X Receptor-alpha Genes and Type 2 Diabetes Risk in a Chinese Han Population. *Diabetes Technol Ther* 14: 293–300.
- Kurabe N, Arai S, Nishijima A, Kubota N, Suizu F, et al. (2009) The death effector domain-containing DEDD supports S6K1 activity via preventing Cdk1-dependent inhibitory phosphorylation. *J Biol Chem* 284: 5050–5055.
